# Supplementary material for: Two-Stage Robust Optimization for the Orienteering Problem with Stochastic Weights
Source: Hindawi journal article supplement (doi:10.1155/2020/5649821), 2020-11-12
Supplement: f1 [file 5649821.f1.pdf]

# Supplementary Material

## OneStageRO.java

```
import ilog.concert.IloException;
import ilog.concert.IloLinearNumExpr;
import ilog.concert.IloNumVar;
import ilog.cplex.IloCplex;
import java.io.IOException;

public class OneStageRO {

    public static void OneStageRO(double Theta) {
        try {
            IloCplex cplex = new IloCplex();

            double Tmax = ReadData.Tmax;
            int n = ReadData.mNumRequests;
            double b[] = ReadData.b;
            double[][] distance = ReadData.distance;
            double[][] deviation = ReadData.deviation;

            IloNumVar[][] y = new IloNumVar[n][n];
            for(int i=0; i<n; i++) {
                y[i] = cplex.boolVarArray(n);
            }
            IloNumVar[] u = cplex.numVarArray(n-1, 1, n-1);

            //objective
            IloLinearNumExpr obj = cplex.linearNumExpr();
            for(int i=1; i<n; i++) {
                for(int j=0; j<n; j++)
                    if(j!=i)
                        obj.addTerm(b[i],y[i][j]);
            }
            cplex.addMaximize(obj);

            //constraints
            //1
            IloLinearNumExpr constraint, constraint1;
            constraint = cplex.linearNumExpr();
            for(int i=0; i<n; i++) {
                for(int j=0; j<n; j++) {
```

```

        constraint.addTerm(distance[i][j]+Theta*deviation[i][j], y[i][j]);
    }
}
cplex.addLe(constraint, Tmax);

//2
constraint = cplex.linearNumExpr();
for(int i=1; i<n; i++)
    constraint.addTerm(1, y[i][0]);
cplex.addEq(constraint, 1);
constraint = cplex.linearNumExpr();
for(int j=1; j<n; j++)
    constraint.addTerm(1, y[0][j]);
cplex.addEq(constraint, 1);

//3
for(int j=1; j<n; j++) {
    constraint = cplex.linearNumExpr();
    constraint1 = cplex.linearNumExpr();
    for(int i=0; i<n; i++) {
        if(i!=j) {
            constraint.addTerm(1, y[i][j]);
            constraint1.addTerm(1, y[j][i]);
        }
    }
    cplex.addEq(constraint, constraint1);
    cplex.addLe(constraint, 1);
    cplex.addLe(constraint1, 1);
}

//4
for(int i=1; i<n; i++) {
    for(int j=1; j<n; j++) {
        constraint = cplex.linearNumExpr();
        constraint.addTerm(1, u[i-1]);
        constraint.addTerm(-1, u[j-1]);
        constraint.addTerm(n-1, y[i][j]);
        cplex.addLe(constraint, n-2);
    }
}

//solve
cplex.solve();

```

```

        cplex.end();

    } catch (IOException e) {
        // TODO Auto-generated catch block
        e.printStackTrace();
    }
}

public static void main(String[] args) throws IOException {
    String file = "./data.txt";
    ReadData.read(file);
    OneStageRO(0.1);
}
}

```

### **ReadData.java**

```

import java.io.*;
import java.util.List;
import java.util.Random;

public class ReadData {
    public static int mNumRequests;
    public static double xPos[];
    public static double yPos[];
    public static double b[];
    public static double deviation[][];
    public static double[][] distance;
    public static final double Tmax = 70;
    public static double Max_dev;

    public static double nominalDis (List<Arc> arcs) {
        double dis = 0;
        for(Arc arc : arcs) {
            int i = arc.head;
            int j = arc.tail;
            dis += distance[i][j];
        }
        return dis;
    }

    public static double robustDis (List<Arc> arcs) {
        double dis = 0;

```

```

    for(Arc arc : arcs) {
        int i = arc.head;
        int j = arc.tail;
        dis += distance[i][j] + deviation[i][j];
    }
    return dis;
}

public static double[] getDeviations(List<Arc> arcs, int length) {
    double[] deviations = new double[length];
    int index = 0;
    for(Arc arc : arcs) {
        int i = arc.head;
        int j = arc.tail;
        deviations[index] = deviation[i][j];
        index++;
    }
    return deviations;
}

public static void read(String input) throws IOException {
    BufferedReader reader = new BufferedReader(new FileReader(new File(input)));
    int lineNumber = 0;
    String line = reader.readLine();
    while (line != null) {
        if (line.startsWith(" "))
            line = line.replaceFirst(" +", "");
        parseLine(line, lineNumber);

        line = reader.readLine();
        lineNumber++;
    }
    reader.close();

    Random r = new Random(0);

    for(int i=0; i<mNumRequests; i++)
        for(int j=0; j<mNumRequests; j++) {
            distance[i][j] = Math.sqrt(Math.pow(xPos[i] - xPos[j], 2) + Math.pow(yPos[i] - yPos[j], 2));
            //deviation[i][j] = r.nextDouble()*distance[i][j];
            deviation[i][j] = 0.5*distance[i][j];
        }

    Max_dev = 0;
}

```

```

for(int i=0; i<mNumRequests; i++) {
    for (int j = 0; j < mNumRequests; j++) {
        if (deviation[i][j] > Max_dev) {
            Max_dev = deviation[i][j];
        }
    }
}

private static void parseLine(String line, int lineNumber) {
    if (lineNumber == 0) {
        mNumRequests = Integer.parseInt(line);
        xPos = new double[mNumRequests];
        yPos = new double[mNumRequests];
        b = new double[mNumRequests];
        deviation = new double[mNumRequests][mNumRequests];
        distance = new double[mNumRequests][mNumRequests];
    } else if (lineNumber <= mNumRequests) {
        String[] values = line.split("\\s+");
        xPos[lineNumber-1] = Double.parseDouble(values[0]);
        yPos[lineNumber-1] = Double.parseDouble(values[1]);
        b[lineNumber-1] = Double.parseDouble(values[2]);
    }
}
}

```

**data.txt**

```

20
4.6  7.1  0
5.7  11.4 20
4.4  12.3 20
2.8  14.3 30
3.2  10.30 15
3.5  9.8  15
4.4  8.4  10
7.8  11.0 20
8.8  9.8  20
7.7  8.2  20
6.3  7.9  15
5.4  8.2  10
5.8  6.8  10
6.7  5.8  25
13.8 13.1 40

```

|      |      |    |
|------|------|----|
| 14.1 | 14.2 | 40 |
| 11.2 | 13.6 | 30 |
| 9.7  | 16.4 | 30 |
| 9.5  | 18.8 | 50 |
| 4.7  | 16.8 | 30 |
